# Supplementary material
Source: publisher figshare collection journal article supplement (https://gsapubs.figshare.com/articles/dataset/_/12533582)
Supplement: Supplementary file 1 [file 1]

# Evidence from accreted seamounts for a depleted component in the early Galapagos plume

Buchs et al.

## **Content of this file:**

1. Tectonostratigraphic constraints on accretion ages
2. Accuracy of the LA-ICPMS trace element analysis of lithium tetraborate glass beads
3. List of geochemical datasets showed in Figure 2
4. Isotope data: methods, data selection and age correction

## References

### **1. Tectonostratigraphic constraints on accretion ages**

The age of accretion of the OIC is constrained by tectonostratigraphic observations at a regional scale. The inner part of the OIC is tectonically juxtaposed in the NE to the Golfito Complex that includes Upper Cretaceous to Eocene sequences of the early south Central American arc (Buchs et al., 2010). The OIC is partly covered by Upper Paleocene, arc-derived sedimentary rocks in the Burica Peninsula (Buchs et al., 2009). These data define a Late Cretaceous-Late Paleocene accretion age for the inner OIC. In the SW, the outer OIC is bounded by the Middle Eocene to Miocene Osa Mélangé, for which several origins have been proposed: (1) accretion of olistostromes composed of material reworked from the margin and deposited in the trench (Di Marco et al., 1995); (2) dismemberment and deformation of basal sequences of the OIC due to tectonic erosion (Meschede et al., 1999); and (3), accretion of the volcano-sedimentary cover of a seamount chain partly preserved in the OIC (Vannucchi et al., 2006). However, detailed (1:5'000 scale) mapping combined with geochemical analysis of igneous blocks and biostratigraphic dating of the mélangé matrix and sedimentary cover of the igneous blocks support only (1) above (Buchs et al., 2009). The main unit of the Osa Mélangé in contact with the OIC includes deformed olistostromes composed of a complex assemblage of Upper Cretaceous to Middle Eocene material reworked from the volcanic arc and the OIC, which deposited in the trench in the Late Eocene shortly before accretion. Therefore, preceding observations constrain the age(s) of accretion of the outer OIC to pre-Late Eocene.

### **2. Accuracy of the LA-ICPMS trace element analysis of lithium tetraborate glass beads**

The accuracy of LA-ICPMS data for lithium tetraborate glass beads depends on the correctness of the 'gas blank assumption', instrument performance / tuning (e.g., detection

system linearity, counting-analog conversion coefficients, dead time), potential matrix effects and interferences and quality of certification of the external standard chemical composition. Gas blank was used to characterize the background noise. This approach can be questioned, because the lithium tetraborate used to dissolve sample powders is not necessary pure, and because of the presence of spectral interferences. We regularly analyze 100% lithium tetraborate glass beads prepared from *Lithium Tetraborate Spectromelt A 10* from Merck, Cat. Nr. 1.10783.5000, using lithium as an internal standard. Impurities found are Ba, Zn, Cr, V, Sc (0.4 – 4 µg/g), with the V and Sc values being related to the presence of spectral overlaps ( $B^{11}Ar^{40+}$  and  $Li^7Ar^{38+}$ , respectively). All REE, as well as U, Th and Pb are below 20 ng/g. Such results allow using the ‘gas blank’ intensity as a reasonable proxy for the background for all igneous samples except rare, depleted compositions of dunite or troctolite affinity (see also details in Buchs et al., 2010).

The role of instrument performance / tuning is usually tested by analyzing a secondary standard with an external certification. We also perform such tests on a regular basis. Results relevant to this study are listed in Table DR3, and show accuracy better than  $\pm 15\%$  for all rare earth elements, Nb, Th, U and Pb. Therefore no important inaccuracy was encountered for the elements used in this study.

### 3. List of geochemical datasets showed in Figure 2

- Boninites from the Izu-Bonin volcanic arc (data retrieved on <http://georoc.mpch-mainz.gwdg.de/georoc/>, 2014)
- Mid-ocean ridge basalts (MORB, superfast segment of the East Pacific Rise, Pollock et al., 2009).
- Off-axis seamounts from the East Pacific Rise (Niu et al., 1999)
- Cocos and Carnegie ridges (Harpp et al., 2005)
- Genovesa Island from the Galapagos archipelago (Harpp et al., 2003)
- Gorgona komatiites (Kerr, 2005; Kamenetski, 2010)
- Depleted basalts from ODP Site 1001 in the Caribbean Large Igneous Province (Kerr et al., 2009)
- Autochthonous oceanic plateau basalts from south Central America (Nicoya and Azuero Marginal complexes, Hauff et al., 2000 and Buchs et al., 2010)
- Oceanic island basalts (OIB) accreted elsewhere in south Central America (Quepos and Azuero, Hauff et al., 2000 and Buchs et al., 2011)
- Primitive Mantle values are after McDonough and Sun (1995).

#### 4. Isotope data: methods, data selection and age correction

Nd-Pb isotope data on a subset of 7 samples from the outer OIC were analyzed at the GEOMAR Helmholtz Center (Kiel, Germany) following the methods of Hoernle et al. (2015), with relevant standard measurements in Table DR4.

The data used for reference fields in Figure 3 include only samples with Pb and Nd isotope data:

- EPR MORB field is based on the Petrological Database (PetDB v.2.8.6, retrieved on <http://www.earthchem.org/>, 2015). All samples come from the superfast EPR (5 to 25° S) and have La/Sm < 1.4. This selection was made based on the assumption that these segments would be the most likely to be similar to depleted basalts of the Osa Igneous Complex.
- Gorgona komatiites are from GEOROC Gorgona precompiled file (retrieved on <http://georoc.mpch-mainz.gwdg.de/>, 2015).
- IODP Site 1001 field is based on Kerr et al. (2009).
- Central America Oceanic Plateau field includes basalts from the Nicoya Complex in Costa Rica (Hauff et al., 2000).
- Genovesa island field includes basalt samples from White et al. (1993).

We have carefully considered age-correcting isotope values for our comparison between above reference datasets and Group 3 basalts and decided not to display these data in Figure 3. This decision is motivated by three main reasons.

First, we corrected radiogenic ingrowth in the studied basalts and reference datasets mentioned above back to 62 Ma (age of formation of Group 3 basalts), but this had no notable effects on our main conclusions based on dissimilar isotopic compositions between Group 3 basalts and EPR MORB. The effect of this correction on Group 3 is given in Table 1 below and on Figure 3 by a vector representing the average correction for radiogenic ingrowth.

Second, age correcting reference datasets is hampered by missing trace elements (Nd, Sm, Pb, U, and Th) in samples including isotope data. To compensate this limitation, we estimated missing traces before age correcting using an approach similar to that of Arevalo and McDonough (2010) for the construction of “canonical” trace element ratios in a given tectonic setting. For example, missing trace elements in EPR MORB from the PETDB were

calculated using  $Pb = 0.1582 \times La$  or  $0.0536 \times Nd$ ,  $U = 0.0180 \times La$  or  $0.0158 \times Nd$ , and  $Th = 0.0466 \times La$  or  $0.0061 \times Nd$ , where the constants are based on global trace element values of N-MORB (Arevalo and McDonough, 2010). Missing trace elements in Gorgona komatiites and Genovesa island basalts were obtained using a similar approach, using average regional trace element ratios calculated based on GEOROC, respectively Harpp et al. (2003) data. Estimating missing trace element data offer a better assessment of the compositional variability in a large sample population; notably, this allowed increasing the number of plotted EPR MORB samples from 33 to 83. However, this approach also introduces scattering in the data (see Figure 1 below) and, therefore, is of relatively limited interest to compare our samples with reference datasets.

Finally, correction of radiogenic ingrowth should be focused on the composition of the source of the basalts, and not only the composition of the basalts at the time of eruption, because Th/Pb, U/Pb, and Sm/Nd ratios increase during partial melting and fractional crystallization; this can subsequently lead to significant, diverging isotopic evolution of the source residue and melting products. Therefore, to further compare the source of Group 3 basalts with that of modern EPR MORB, we modelled the radiogenic ingrowth of the source of Group 3 basalts from 62 Ma to present, assuming that trace elements in the source were similar to that of depleted DMM (values of Workman and Hart, 2005). Isotopic values of Group 3 basalts age-corrected back to 62 Ma were used as the starting composition of the source of these basalts. Our results indicate there is very little difference between isotopic compositions of Group 3 basalts and their source at present (Table 1 below). In other words, this two-step approach shows that the composition of Group 3 basalts in Figure 3 is virtually identical to that of their source at present, which clearly supports isotopic dissimilarity between the source of Group 3 basalts and that of EPR MORB. However, it is important to remember that the validity of this approach relies on the assumption that trace elements in the source residue of Group 3 basalts are similar to those of depleted DMM *sensu* Workman and Hart (2005).

In summary, age correction introduces both advantages and disadvantages, which in any case plays a very limited role in the comparison of relatively young depleted igneous rocks (i.e. Group 3 basalts and Gorgona Komatiites) and modern EPR MORB. Importantly, whichever technique was used we consistently observed a clear isotopic dissimilarity between EPR MORB and Group 3 basalts, with isotopic similarity between Group 3 basalts and Gorgona komatiites.

| $^{206}\text{Pb}/^{204}\text{Pb}$ | $^{208}\text{Pb}/^{204}\text{Pb}$ | $\epsilon\text{Nd}$ |                                                   |
|-----------------------------------|-----------------------------------|---------------------|---------------------------------------------------|
| -0.105                            | -0.054                            | -0.360              | Correction for radiogenic ingrowth in the basalts |
| 0.079                             | 0.057                             | 0.513               | Radiogenic ingrowth of the source                 |
| -0.026                            | 0.004                             | 0.154               | Combined effects (source at present)              |

**Table 1.** Average isotopic variations of Group 3 basalts and their source with age correction (62 Ma). See text for explanations.

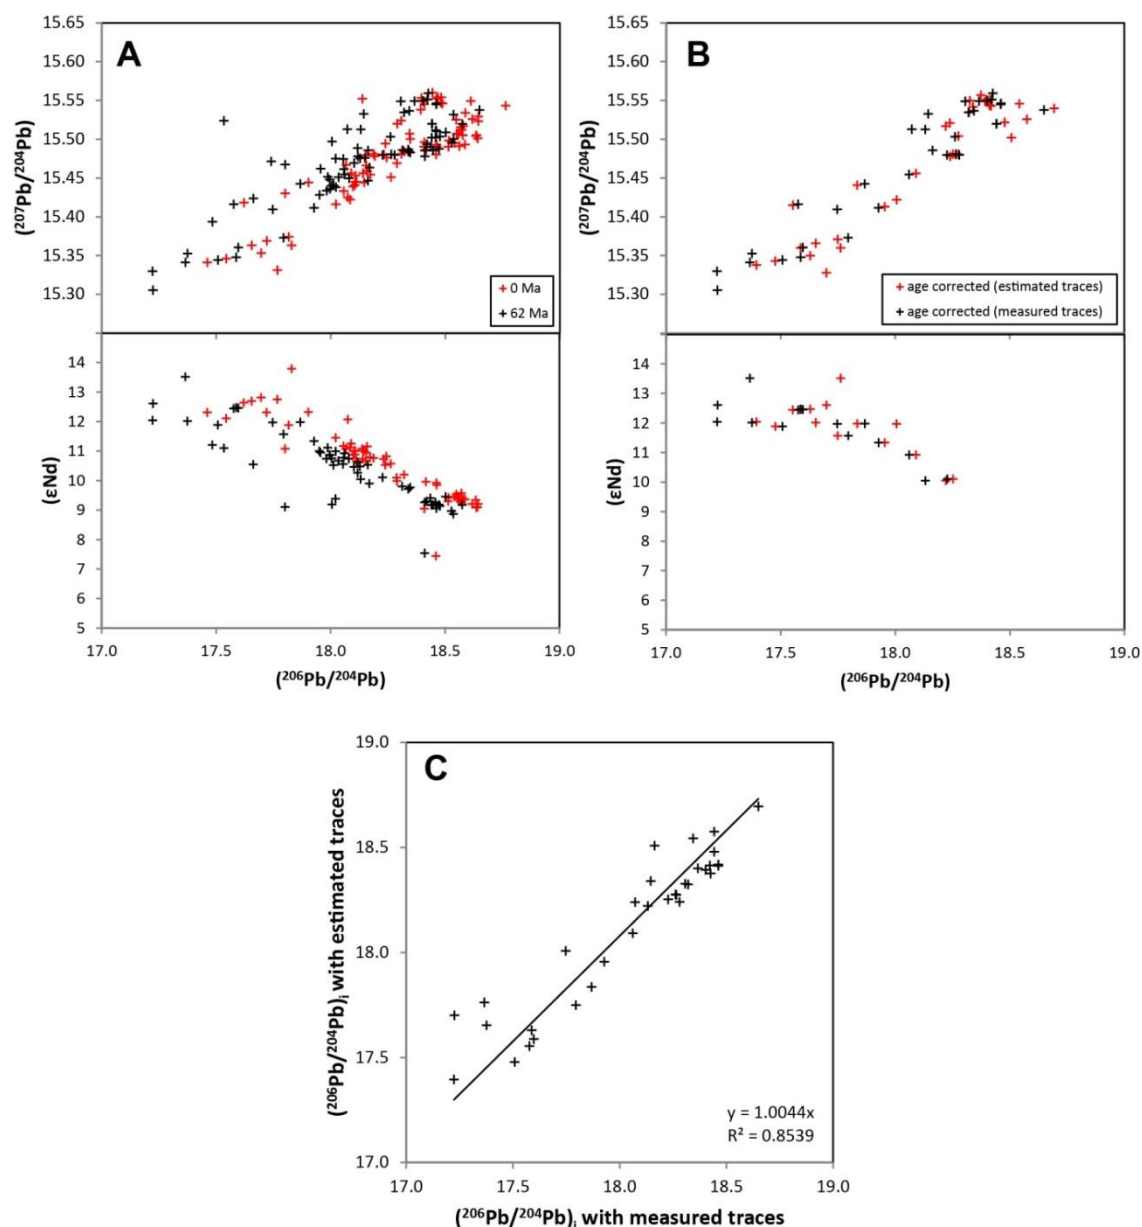

**Figure 1.** Effects of age correction on EPR MORB radiogenic isotope data (sources given above) using measured and estimated trace element ratios. (A) Full dataset with measured and estimated trace elements. Note increased data scattering for the initial ratios (in particular  $\epsilon\text{Nd}_i$ ). (B) Sample subset with complementary radiogenic isotope and trace element data. (C) Comparison of initial  $^{206}\text{Pb}/^{204}\text{Pb}$  using measured and estimated U/Pb in the same sample subset as (B); note scattering of the data due to estimation technique.

## References

- Buchs, D. M., Arculus, R. J., Baumgartner, P. O., Baumgartner-Mora, C., and Ulianov, A., 2010, Late Cretaceous arc development on the SW margin of the Caribbean Plate: Insights from the Golfito, Costa Rica, and Azuero, Panama, complexes: *Geochemistry Geophysics Geosystems*, v. 11, no. 7, Q07S24.
- Buchs, D. M., Arculus, R. J., Baumgartner, P. O., and Ulianov, A., 2011, Oceanic intraplate volcanoes exposed: Example from seamounts accreted in Panama: *Geology*, v. 39, no. 4, p. 335-338.
- Di Marco, G., Baumgartner, P. O., and Channell, J. E. T., 1995, Late Cretaceous-early Tertiary paleomagnetic data and a revised tectonostratigraphic subdivision of Costa Rica and western Panama.; Geologic and tectonic development of the Caribbean Plate boundary in southern Central America, in Mann, P., ed., *Geologic and Tectonic Development of the Caribbean plate boundary in southern Central America*, Volume 295, p. 1-27.
- Harpp, K. S., Fornari, D. J., Geist, D. J., and Kurz, M. D., 2003, Genovesa Submarine Ridge: A manifestation of plume-ridge interaction in the northern Galápagos Islands: *Geochemistry Geophysics Geosystems*, v. 4, no. 9, p. 8511.
- Harpp, K. S., Wanless, V. D., Otto, R. H., Hoernle, K. A. J., and Werner, R., 2005, The Cocos and Carnegie Aseismic Ridges: a Trace Element Record of Long-term Plume-Spreading Center Interaction: *Journal of Petrology*, v. 46, no. 1, p. 109-133.
- Hauff, F., Hoernle, K. A., van den Bogaard, P., Alvarado, G. E., and Garbe-Schonberg, D., 2000, Age and geochemistry of basaltic complexes in Western Costa Rica: Contributions to the geotectonic evolution of Central America: *Geochemistry Geophysics Geosystems*, v. 1, no. 5, p. 1009, doi:10.1029/1999GC000020.
- Hoernle, K., Rohde, J., Hauff, F., Garbe-Schonberg, D., Homrighausen, S., Werner, R., and Morgan, J.P., 2015, How and when plume zonation appeared during the 132 Myr evolution of the Tristan Hotspot: *Nature Communications*, v. 6, p. 7799, doi:10.1038/ncomms8799.
- Kamenetsky, V. S., Gurenko, A. A., and Kerr, A. C., 2010, Composition and temperature of komatiite melts from Gorgona Island, Colombia, constrained from olivine-hosted melt inclusions: *Geology*, v. 38, no. 11, p. 1003-1006.
- Kerr, A. C., Pearson, D. G., and Nowell, G. M., 2009, Magma source evolution beneath the Caribbean oceanic plateau: new insights from elemental and Sr-Nd-Pb-Hf isotopic studies of ODP Leg 165 Site 1001 basalts, in James, K. H., Lorente, M. A., and Pindell,

- J. L., eds., *The Origin and Evolution of the Caribbean Plate*, Volume 328, Geological Society, p. 809-827.
- Kerr, A. C., 2005, La Isla de Gorgona, Colombia: A petrological enigma?: *Lithos*, v. 84, no. 1-2, p. 77-101.
- McDonough, W. F., and Sun, S. S., 1995, *The Composition of the Earth: Chemical Geology*, v. 120, no. 3-4, p. 223-253.
- Meschede, M., Zweigel, P., Frisch, W., and Voelker, D., 1999, Melange formation by subduction erosion: the case of the Osa melange in southern Costa Rica: *Terra Nova*, v. 11, no. 4, p. 141-148.
- Niu, Y., Collerson, K. D., Batiza, R., Wendt, J. I., and Regelous, M., 1999, Origin of enriched-type mid-ocean ridge basalt at ridges far from mantle plumes: The East Pacific Rise at 11°20'N: *Journal of Geophysical Research*, v. 104, no. B4, p. 7067-7087.
- Pollock, M. A., Klein, E. M., Karson, J. A., and Coleman, D. S., 2009, Compositions of dikes and lavas from the Pito Deep Rift: Implications for crustal accretion at superfast spreading centers: *Journal of Geophysical Research*, v. 114, no. B3, B03207.
- Vannucchi, P., Fisher, D. M., Bier, S., and Gardner, T. W., 2006, From seamount accretion to tectonic erosion; formation of Osa melange and the effects of Cocos Ridge subduction in southern Costa Rica: *Tectonics*, v. 25, TC2004, doi:2010.1029/2005TC001855.
- White, W. M., McBirney, A. R., and Duncan, R. A., 1993, Petrology and Geochemistry of the Galápagos Islands: Portrait of a Pathological Mantle Plume: *Journal of Geophysical Research*, v. 98, no. B11, p. 19533-19563.
- Workman, R. K., and Hart, S. R., 2005, Major and trace element composition of the depleted MORB mantle (DMM): *Earth and Planetary Science Letters*, v. 231, no. 1-2, p. 53-72.

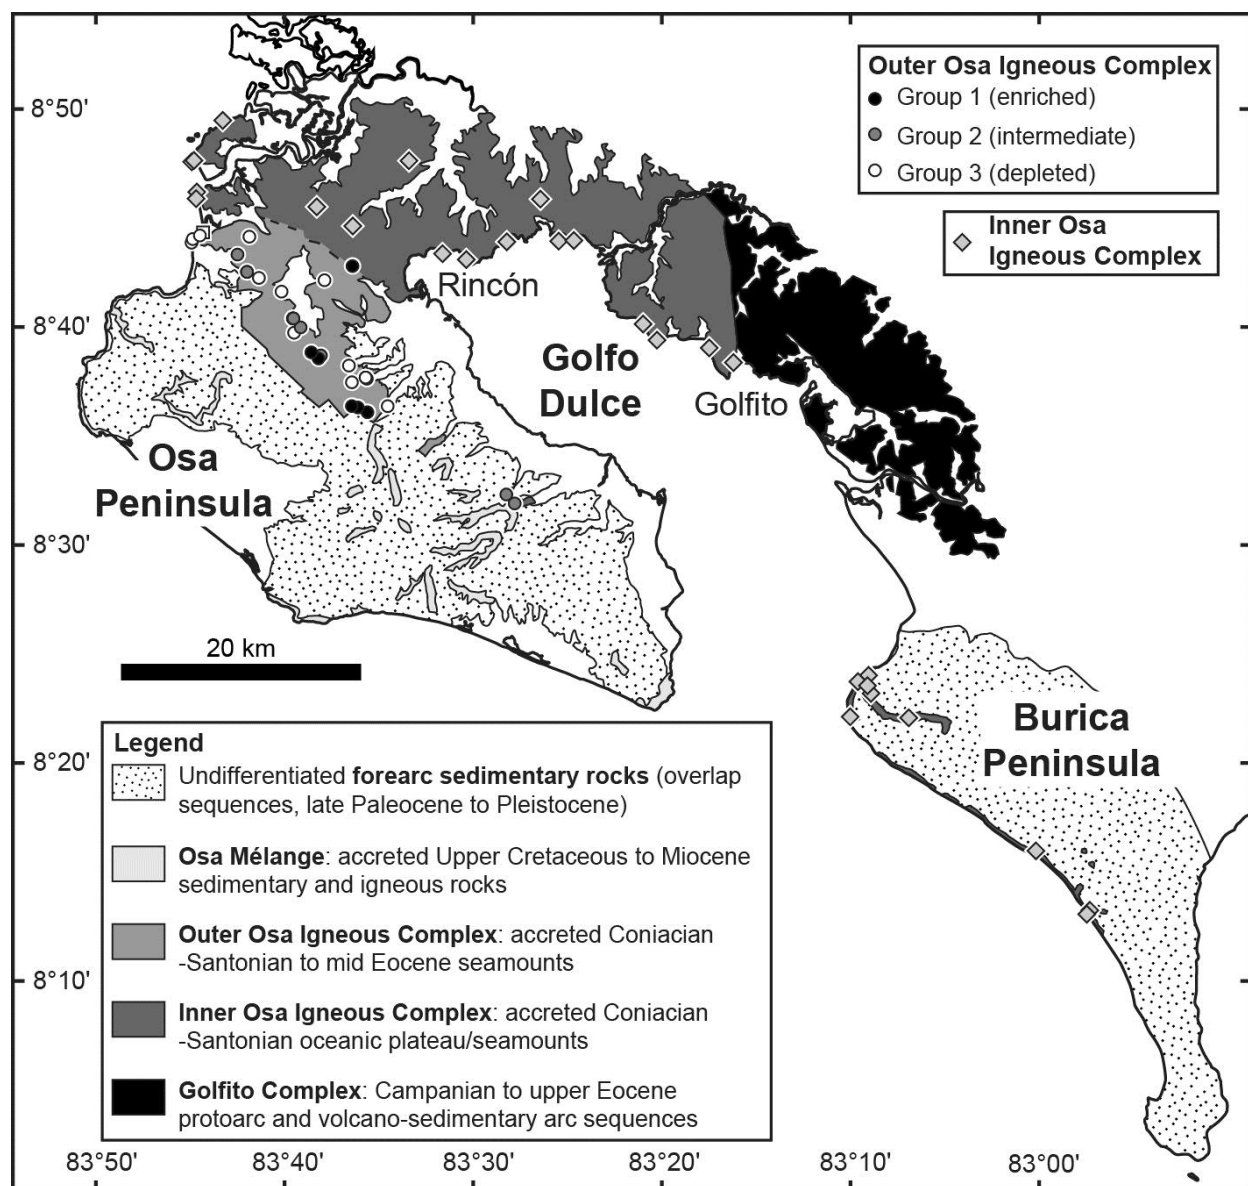

**Figure DR1.** General tectonic setting and simplified geological map of the studied area (modified after Buchs et al., 2009), also displaying the location of the samples used in this study (circle symbols for new geochemical analyses and squares symbols for data by Hauff et al., 2000).



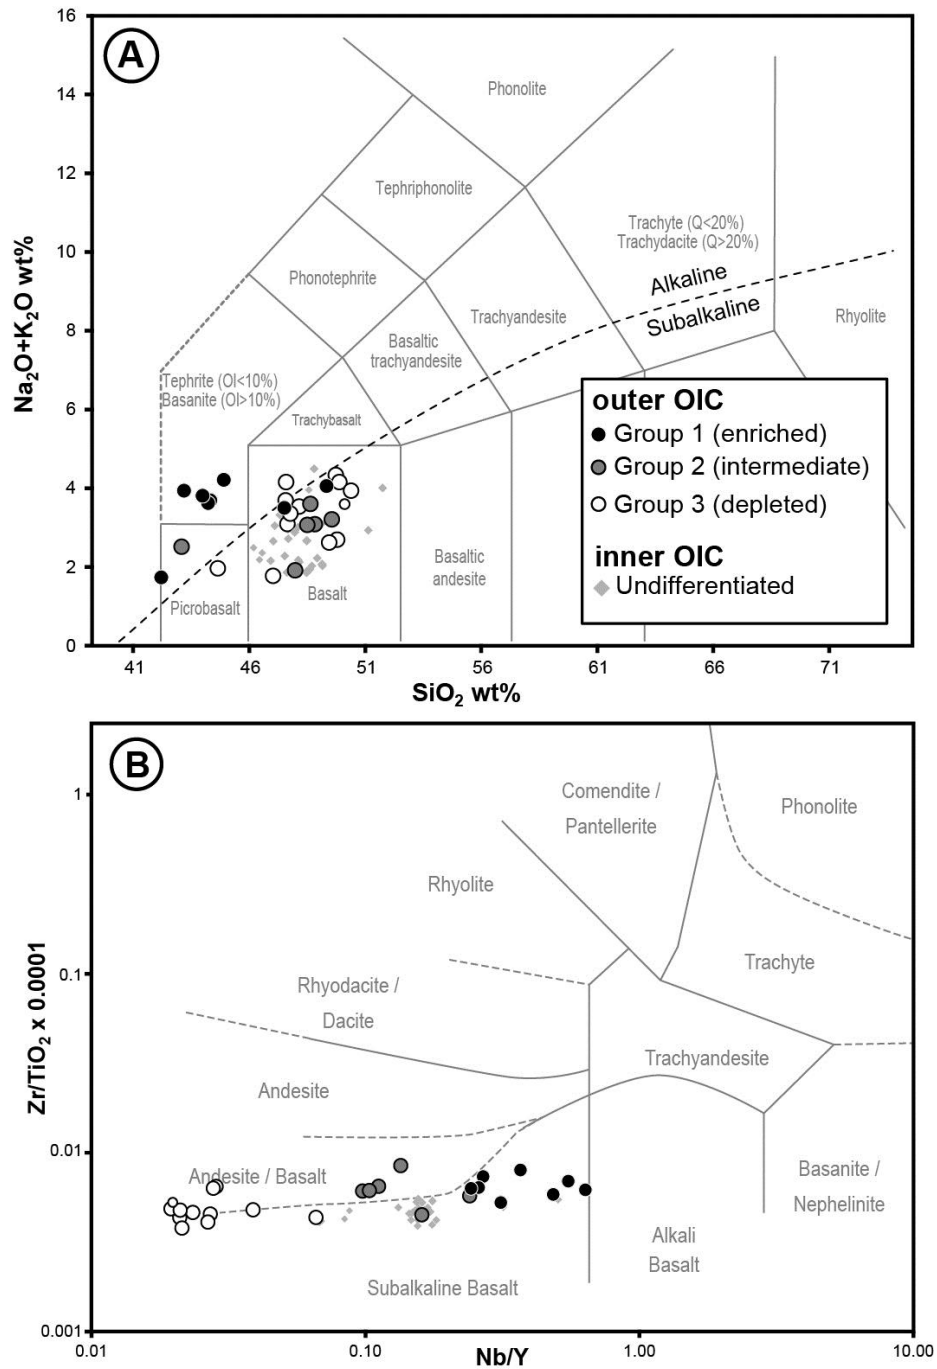

**Figure DR2.** TAS (A) and Winchester and Floyd (1977) (B) diagrams outlining compositional variation (essentially alkalinity) among the geochemical groups of the outer Osa Igneous Complex and basalts of the inner Osa Igneous Complex.

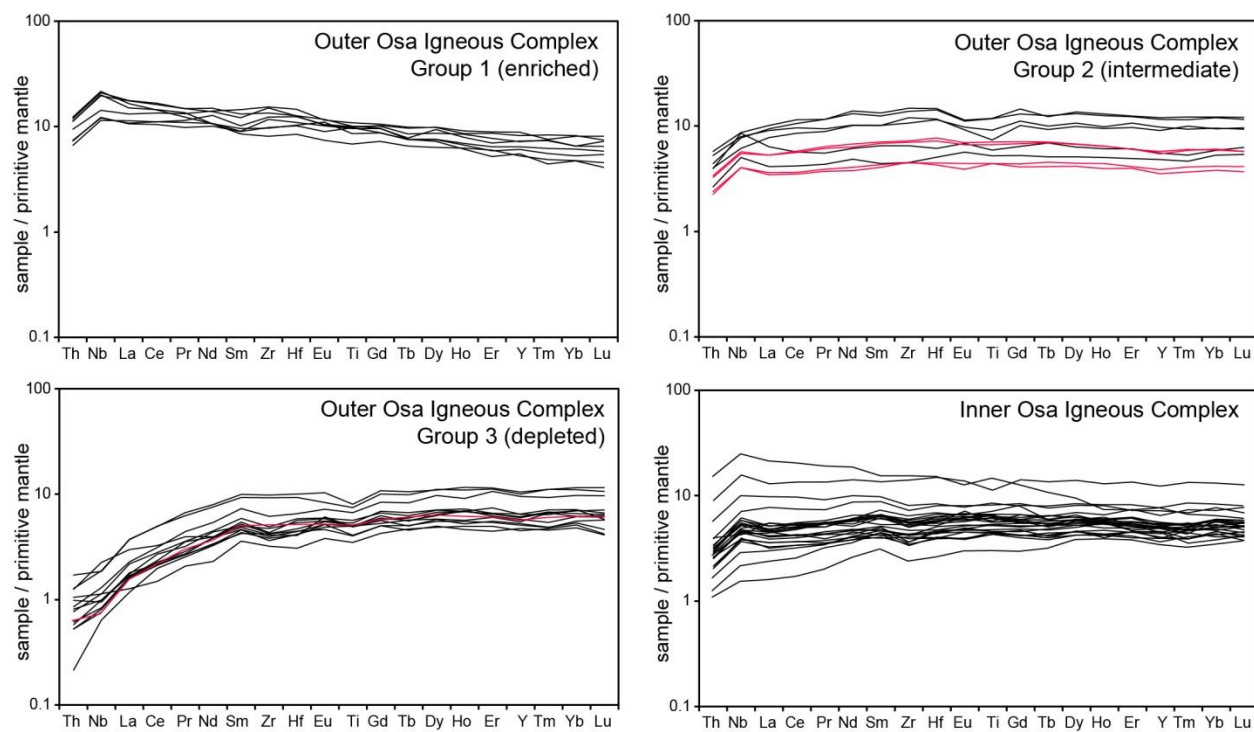

**Figure DR3.** Primitive mantle-normalized multi-element diagrams used for the definition of geochemical groups in the outer Osa Igneous Complex. Samples in orange are from Hauff et al. (2000).

**Table DR1. Location of analyzed samples**

| Sample    | Unit      | Rock type     | Geochemical group | Northing | Easting   |
|-----------|-----------|---------------|-------------------|----------|-----------|
| DB02-191  | outer OIC | Basalt        | Group 1           | 8.71289  | -83.52766 |
| DB02-242  | outer OIC | Basalt        | Group 1           | 8.64599  | -83.55857 |
| DB02-250  | outer OIC | Basalt        | Group 1           | 8.60529  | -83.52406 |
| DB05-113  | outer OIC | Basalt        | Group 1           | 8.60213  | -83.51498 |
| DB05-119  | outer OIC | Basalt        | Group 1           | 8.60665  | -83.52678 |
| DB05-121  | outer OIC | Basalt        | Group 1           | 8.60710  | -83.52679 |
| DB05-153  | outer OIC | Basalt        | Group 1           | 8.66724  | -83.56493 |
| DB05-161  | outer OIC | Basalt        | Group 1           | 8.64374  | -83.55403 |
| DB02-198b | outer OIC | Basalt        | Group 2           | 8.72196  | -83.61580 |
| DB02-260  | outer OIC | Basalt        | Group 2           | 8.70839  | -83.60854 |
| DB02-261  | outer OIC | Basaltic dyke | Group 2           | 8.70839  | -83.60854 |
| DB05-149  | outer OIC | Dolerite      | Group 2           | 8.66588  | -83.56765 |
| DB05-155  | outer OIC | Basalt        | Group 2           | 8.67313  | -83.57356 |
| DB05-156  | outer OIC | Basalt        | Group 2           | 8.67312  | -83.57329 |
| DB02-196  | outer OIC | Basalt        | Group 3           | 8.62699  | -83.51678 |
| DB02-197  | outer OIC | Basalt        | Group 3           | 8.62789  | -83.51769 |
| DB02-198a | outer OIC | Basalt        | Group 3           | 8.62789  | -83.51769 |
| DB02-207  | outer OIC | Basalt        | Group 3           | 8.70205  | -83.54947 |
| DB02-216  | outer OIC | Basalt        | Group 3           | 8.73552  | -83.60671 |
| DB02-239  | outer OIC | Basalt        | Group 3           | 8.63694  | -83.53041 |
| DB05-114  | outer OIC | Basalt        | Group 3           | 8.60596  | -83.50089 |
| DB05-135  | outer OIC | Basalt        | Group 3           | 8.62383  | -83.52814 |
| DB05-152  | outer OIC | Gabbro        | Group 3           | 8.66182  | -83.57265 |
| DB05-158  | outer OIC | Gabbro        | Group 3           | 8.69347  | -83.58218 |
| DJ01-104  | outer OIC | Basalt        | Group 3           | 8.73100  | -83.65125 |
| DJ01-106  | outer OIC | Basalt        | Group 3           | 8.73371  | -83.65034 |
| DJ01-107  | outer OIC | Basalt        | Group 3           | 8.73643  | -83.64488 |
| DB02-107  | inner OIC | Basalt        | n/a               | 8.73269  | -83.37315 |
| DB02-110  | inner OIC | Basalt        | n/a               | 8.73268  | -83.35588 |
| DB02-119  | inner OIC | Basalt        | n/a               | 8.66753  | -83.30414 |
| DB02-120  | inner OIC | Basalt        | n/a               | 8.65667  | -83.29416 |
| DB02-132  | inner OIC | Basalt        | n/a               | 8.65030  | -83.25419 |
| DB02-135  | inner OIC | Basalt        | n/a               | 8.63943  | -83.23603 |
| DB02-160  | inner OIC | Basalt        | n/a               | 8.71828  | -83.44041 |
| DB02-165  | inner OIC | Basalt        | n/a               | 8.73181  | -83.40950 |
| DB02-201  | inner OIC | Basalt        | n/a               | 8.79607  | -83.48672 |
| DB02-203  | inner OIC | Basalt        | n/a               | 8.79425  | -83.48490 |
| DB02-204  | inner OIC | Basalt        | n/a               | 8.79425  | -83.48490 |
| DB02-230  | inner OIC | Basalt        | n/a               | 8.72280  | -83.45858 |
| DB02-246  | inner OIC | Basalt        | n/a               | 8.75902  | -83.55490 |
| DB02-266  | inner OIC | Basalt        | n/a               | 8.82413  | -83.62761 |
| DB05-107  | inner OIC | Basalt        | n/a               | 8.53108  | -83.40329 |
| DB05-108  | inner OIC | Basalt        | n/a               | 8.53832  | -83.41009 |
| DB06-054  | inner OIC | Basalt        | n/a               | 8.38612  | -83.13055 |
| DB06-058  | inner OIC | Basalt        | n/a               | 8.36709  | -83.10153 |
| DB06-061  | inner OIC | Basalt        | n/a               | 8.36816  | -83.14595 |
| DB06-065  | inner OIC | Basalt        | n/a               | 8.33269  | -83.11187 |
| DB06-066  | inner OIC | Basalt        | n/a               | 8.33191  | -83.11064 |
| DB06-070  | inner OIC | Basalt        | n/a               | 8.26539  | -83.00409 |
| DB06-075  | inner OIC | Dolerite      | n/a               | 8.33737  | -83.11839 |
| DJ01-022  | inner OIC | Basalt        | n/a               | 8.76537  | -83.64761 |
| DJ01-115  | inner OIC | Basalt        | n/a               | 8.79430  | -83.64942 |
| GDM-90303 | inner OIC | Basalt        | n/a               | 8.40063  | -83.13264 |
| GDM-91044 | inner OIC | Basalt        | n/a               | 8.39248  | -83.13266 |

Table DR2. XRF analytical results (wt%)

| Sample    | Group     | SiO <sub>2</sub> | TiO <sub>2</sub> | Al <sub>2</sub> O <sub>3</sub> | Fe <sub>2</sub> O <sub>3</sub> | MnO  | MgO   | CaO   | Na <sub>2</sub> O | K <sub>2</sub> O | P <sub>2</sub> O <sub>5</sub> | LOI  | Total  |
|-----------|-----------|------------------|------------------|--------------------------------|--------------------------------|------|-------|-------|-------------------|------------------|-------------------------------|------|--------|
| DB02-191  | Group 1   | 47.51            | 1.96             | 13.50                          | 12.27                          | 0.18 | 7.06  | 9.65  | 3.31              | 0.19             | 0.16                          | 3.42 | 99.22  |
| DB02-242  | Group 1   | 42.20            | 1.37             | 14.05                          | 12.54                          | 0.15 | 12.35 | 9.29  | 1.56              | 0.18             | 0.14                          | 5.45 | 99.29  |
| DB02-250  | Group 1   | 44.23            | 2.02             | 16.46                          | 12.99                          | 0.17 | 7.85  | 7.31  | 2.90              | 0.74             | 0.20                          | 4.36 | 99.23  |
| DB05-113  | Group 1   | 44.91            | 2.04             | 17.19                          | 10.62                          | 0.14 | 8.07  | 8.45  | 2.45              | 1.76             | 0.23                          | 3.15 | 99.02  |
| DB05-119  | Group 1   | 43.19            | 2.18             | 15.77                          | 13.99                          | 0.22 | 8.40  | 6.89  | 3.32              | 0.63             | 0.23                          | 4.30 | 99.12  |
| DB05-121  | Group 1   | 43.99            | 1.94             | 16.41                          | 13.27                          | 0.16 | 7.44  | 8.04  | 3.06              | 0.76             | 0.18                          | 3.61 | 98.86  |
| DB05-153  | Group 1   | 49.34            | 1.97             | 14.70                          | 9.62                           | 0.16 | 7.03  | 9.65  | 3.66              | 0.40             | 0.25                          | 2.66 | 99.43  |
| DB05-161  | Group 1   | 44.33            | 1.73             | 15.10                          | 10.77                          | 0.14 | 6.91  | 12.41 | 3.25              | 0.45             | 0.17                          | 4.15 | 99.42  |
| DB02-198b | Group 2   | 43.09            | 1.19             | 17.76                          | 11.01                          | 0.14 | 6.96  | 12.08 | 2.20              | 0.32             | 0.19                          | 3.81 | 98.75  |
| DB02-260  | Group 2   | 49.56            | 1.49             | 15.47                          | 11.05                          | 0.18 | 6.31  | 9.96  | 3.09              | 0.13             | 0.15                          | 1.69 | 99.07  |
| DB02-261  | Group 2   | 48.50            | 2.36             | 13.34                          | 14.50                          | 0.26 | 6.41  | 9.34  | 2.98              | 0.10             | 0.23                          | 1.47 | 99.49  |
| DB05-149  | Group 2   | 47.98            | 1.05             | 13.91                          | 11.96                          | 0.18 | 9.08  | 11.28 | 1.78              | 0.14             | 0.08                          | 2.08 | 99.53  |
| DB05-155  | Group 2   | 48.83            | 1.84             | 13.54                          | 13.20                          | 0.23 | 6.89  | 10.38 | 2.97              | 0.12             | 0.17                          | 1.05 | 99.23  |
| DB05-156  | Group 2   | 48.64            | 2.40             | 13.17                          | 15.20                          | 0.26 | 6.03  | 8.80  | 3.44              | 0.17             | 0.22                          | 1.13 | 99.44  |
| DB02-196  | Group 3   | 47.76            | 1.00             | 14.14                          | 11.02                          | 0.18 | 7.32  | 10.65 | 3.48              | 0.03             | 0.08                          | 3.64 | 99.30  |
| DB02-197  | Group 3   | 47.65            | 1.07             | 15.79                          | 11.61                          | 0.20 | 6.71  | 11.11 | 2.81              | 0.28             | 0.08                          | 1.97 | 99.27  |
| DB02-198a | Group 3   | 48.15            | 1.02             | 15.28                          | 11.44                          | 0.20 | 7.75  | 9.55  | 3.10              | 0.44             | 0.07                          | 2.41 | 99.41  |
| DB02-207  | Group 3   | 44.64            | 0.70             | 12.86                          | 12.02                          | 0.16 | 13.57 | 8.19  | 1.71              | 0.27             | 0.07                          | 5.22 | 99.40  |
| DB02-216  | Group 3   | 47.03            | 0.82             | 16.86                          | 9.83                           | 0.18 | 6.90  | 13.66 | 1.75              | 0.03             | 0.06                          | 2.22 | 99.33  |
| DB02-239  | Group 3   | 47.57            | 1.50             | 13.11                          | 14.03                          | 0.21 | 6.36  | 9.98  | 3.67              | 0.03             | 0.14                          | 2.72 | 99.32  |
| DB05-114  | Group 3   | 49.45            | 1.35             | 13.09                          | 15.01                          | 0.22 | 6.40  | 10.68 | 2.58              | 0.05             | 0.09                          | 0.55 | 99.46  |
| DB05-135  | Group 3   | 47.77            | 1.62             | 14.20                          | 13.97                          | 0.23 | 6.29  | 10.57 | 3.15              | 0.21             | 0.14                          | 1.36 | 99.50  |
| DB05-152  | Group 3   | 47.59            | 0.81             | 20.44                          | 7.69                           | 0.13 | 5.45  | 10.79 | 2.25              | 1.91             | 0.06                          | 2.09 | 99.21  |
| DB05-158  | Group 3   | 49.79            | 0.99             | 14.82                          | 8.98                           | 0.15 | 7.58  | 13.04 | 2.58              | 0.12             | 0.07                          | 1.01 | 99.13  |
| DJ01-104  | Group 3   | 49.73            | 1.13             | 14.31                          | 11.20                          | 0.25 | 6.19  | 9.67  | 3.43              | 0.91             | 0.10                          | 3.06 | 99.97  |
| DJ01-106  | Group 3   | 49.88            | 1.00             | 13.97                          | 10.62                          | 0.18 | 6.04  | 11.04 | 3.71              | 0.46             | 0.08                          | 2.95 | 99.92  |
| DJ01-107  | Group 3   | 50.40            | 1.01             | 13.92                          | 11.05                          | 0.19 | 6.51  | 11.08 | 3.56              | 0.38             | 0.08                          | 1.81 | 99.99  |
| DB02-107  | inner OIC | 47.63            | 1.08             | 14.61                          | 11.19                          | 0.34 | 8.37  | 12.85 | 1.81              | 0.06             | 0.09                          | 1.90 | 99.92  |
| DB02-110  | inner OIC | 46.92            | 1.25             | 14.06                          | 12.56                          | 0.22 | 7.88  | 11.71 | 2.06              | 0.10             | 0.10                          | 2.18 | 99.05  |
| DB02-119  | inner OIC | 48.08            | 1.71             | 14.18                          | 10.22                          | 0.17 | 7.16  | 11.26 | 3.20              | 0.29             | 0.14                          | 2.77 | 99.18  |
| DB02-120  | inner OIC | 48.62            | 1.12             | 14.29                          | 12.62                          | 0.20 | 7.66  | 11.70 | 1.89              | 0.06             | 0.09                          | 1.48 | 99.74  |
| DB02-132  | inner OIC | 48.94            | 1.34             | 14.25                          | 11.49                          | 0.17 | 7.81  | 12.42 | 2.16              | 0.07             | 0.11                          | 1.28 | 100.03 |
| DB02-135  | inner OIC | 48.16            | 1.23             | 14.55                          | 11.37                          | 0.22 | 7.55  | 12.33 | 2.04              | 0.09             | 0.10                          | 1.94 | 99.57  |
| DB02-160  | inner OIC | 46.19            | 1.10             | 13.92                          | 13.19                          | 0.18 | 8.00  | 11.31 | 2.36              | 0.14             | 0.08                          | 2.66 | 99.10  |
| DB02-165  | inner OIC | 48.70            | 0.86             | 14.41                          | 10.69                          | 0.19 | 8.92  | 12.45 | 1.95              | 0.08             | 0.07                          | 1.77 | 100.09 |
| DB02-201  | inner OIC | 46.45            | 0.63             | 19.25                          | 8.93                           | 0.16 | 6.12  | 13.09 | 2.10              | 0.09             | 0.05                          | 3.12 | 99.99  |
| DB02-203  | inner OIC | 48.80            | 1.64             | 13.07                          | 15.89                          | 0.25 | 5.98  | 6.92  | 4.37              | 0.13             | 0.13                          | 2.85 | 100.03 |
| DB02-204  | inner OIC | 47.11            | 1.13             | 14.44                          | 12.45                          | 0.20 | 6.64  | 10.17 | 2.72              | 0.34             | 0.09                          | 4.21 | 99.49  |
| DB02-230  | inner OIC | 48.12            | 1.28             | 13.84                          | 12.56                          | 0.35 | 7.24  | 12.00 | 2.09              | 0.09             | 0.11                          | 1.43 | 99.11  |
| DB02-246  | inner OIC | 51.14            | 1.16             | 13.46                          | 14.55                          | 0.23 | 5.17  | 8.79  | 2.80              | 0.13             | 0.13                          | 1.57 | 99.12  |
| DB02-266  | inner OIC | 48.09            | 1.32             | 13.44                          | 13.69                          | 0.22 | 7.16  | 9.99  | 2.73              | 0.28             | 0.09                          | 2.19 | 99.20  |
| DB05-107  | inner OIC | 48.50            | 0.89             | 14.47                          | 10.63                          | 0.20 | 8.68  | 12.82 | 1.78              | 0.09             | 0.07                          | 1.19 | 99.32  |
| DB05-108  | inner OIC | 47.68            | 0.91             | 14.61                          | 11.10                          | 0.18 | 9.13  | 10.55 | 2.50              | 0.23             | 0.07                          | 2.20 | 99.16  |
| DB06-054  | inner OIC | 48.47            | 0.90             | 14.78                          | 10.75                          | 0.16 | 9.01  | 12.92 | 1.78              | 0.08             | 0.07                          | 0.68 | 99.59  |
| DB06-058  | inner OIC | 47.53            | 1.29             | 14.24                          | 12.75                          | 0.23 | 7.62  | 12.10 | 2.23              | 0.06             | 0.11                          | 2.02 | 100.17 |
| DB06-061  | inner OIC | 51.76            | 2.28             | 11.57                          | 18.08                          | 0.26 | 2.65  | 6.86  | 3.94              | 0.07             | 0.24                          | 1.42 | 99.12  |
| DB06-065  | inner OIC | 46.57            | 0.96             | 15.09                          | 11.72                          | 0.23 | 8.18  | 12.35 | 2.22              | 0.15             | 0.07                          | 2.04 | 99.57  |
| DB06-066  | inner OIC | 47.33            | 2.96             | 13.66                          | 14.24                          | 0.21 | 6.29  | 10.58 | 2.77              | 0.56             | 0.29                          | 1.24 | 100.13 |
| DB06-070  | inner OIC | 47.80            | 1.05             | 14.27                          | 11.43                          | 0.17 | 8.28  | 11.13 | 3.02              | 0.07             | 0.08                          | 2.95 | 100.25 |
| DB06-075  | inner OIC | 48.57            | 1.48             | 13.08                          | 15.78                          | 0.24 | 6.17  | 9.26  | 3.68              | 0.29             | 0.12                          | 1.67 | 100.31 |
| DJ01-022  | inner OIC | 47.04            | 0.88             | 14.73                          | 10.66                          | 0.16 | 8.33  | 12.41 | 2.54              | 0.12             | 0.07                          | 2.95 | 99.89  |
| DJ01-115  | inner OIC | 47.67            | 1.25             | 13.89                          | 11.92                          | 0.21 | 7.85  | 11.06 | 2.77              | 0.19             | 0.11                          | 2.87 | 99.79  |
| GDM-90303 | inner OIC | 49.13            | 0.96             | 14.13                          | 11.18                          | 0.18 | 8.13  | 11.16 | 2.29              | 0.81             | 0.08                          | 1.88 | 99.93  |
| GDM-91044 | inner OIC | 49.16            | 0.86             | 14.60                          | 10.54                          | 0.18 | 8.62  | 12.29 | 1.85              | 0.18             | 0.06                          | 1.47 | 99.81  |

Table DR3. LA-ICP-MS analytical results (ppm)

| Sample    | Group     | Sc   | V   | Ni  | Rb    | Sr  | Y  | Zr  | Nb    | Cs    | Ba     | La     | Ce     | Pr    | Nd     | Sm    | Eu    | Gd    | Tb    | Dy    | Ho    | Er    | Tm    | Yb    | Lu    | Hf    | Pb     | Th    | U     |
|-----------|-----------|------|-----|-----|-------|-----|----|-----|-------|-------|--------|--------|--------|-------|--------|-------|-------|-------|-------|-------|-------|-------|-------|-------|-------|-------|--------|-------|-------|
| DB02-191  | Group 1   | 43.6 | 368 | 85  | 2.67  | 251 | 26 | 103 | 8.07  | 0.188 | 95.2   | 6.914  | 17.541 | 2.497 | 12.672 | 3.657 | 1.383 | 4.796 | 0.743 | 5.073 | 0.994 | 2.577 | 0.378 | 2.323 | 0.366 | 2.883 | 1.145  | 0.580 | 0.189 |
| DB02-242  | Group 1   | 40.2 | 276 | bdl | 3.72  | 154 | 23 | 85  | 14.21 | 0.315 | 48.5   | 10.717 | 24.136 | 3.143 | 13.318 | 3.462 | 1.144 | 3.948 | 0.647 | 4.280 | 0.933 | 2.620 | 0.330 | 2.094 | 0.307 | 2.398 | 1.450  | 0.980 | 0.268 |
| DB02-250  | Group 1   | 35.1 | 268 | 89  | 13.52 | 362 | 31 | 129 | 7.93  | 1.957 | 107.5  | 6.984  | 18.656 | 2.907 | 15.988 | 4.148 | 1.619 | 5.484 | 0.846 | 5.817 | 1.262 | 3.389 | 0.507 | 2.877 | 0.438 | 3.526 | 1.047  | 0.588 | 0.189 |
| DB05-113  | Group 1   | 32.0 | 278 | 147 | 18.86 | 606 | 24 | 142 | 12.91 | bdl   | 362.1  | 11.375 | 27.169 | 3.764 | 18.722 | 5.342 | 1.801 | 5.263 | 0.749 | 4.873 | 0.911 | 2.277 | 0.301 | 2.084 | 0.277 | 3.609 | 0.836  | 0.898 | 0.271 |
| DB05-119  | Group 1   | 37.8 | 290 | 137 | 15.07 | 623 | 35 | 161 | 9.42  | bdl   | 157.7  | 8.559  | 22.530 | 3.377 | 17.603 | 5.877 | 1.776 | 5.566 | 0.978 | 6.628 | 1.280 | 3.785 | 0.566 | 3.632 | 0.506 | 4.130 | 0.708  | 0.751 | 0.211 |
| DB05-121  | Group 1   | 37.2 | 277 | 92  | 16.45 | 437 | 31 | 123 | 7.54  | bdl   | 116.7  | 7.389  | 18.610 | 2.776 | 13.446 | 3.662 | 1.574 | 5.205 | 0.773 | 6.347 | 1.183 | 3.072 | 0.502 | 2.890 | 0.491 | 3.108 | 0.886  | 0.529 | 0.271 |
| DB05-153  | Group 1   | 45.2 | 365 | 70  | 4.45  | 240 | 38 | 158 | 13.81 | bdl   | 59.9   | 11.446 | 27.941 | 3.768 | 17.421 | 4.938 | 1.587 | 5.599 | 0.958 | 6.672 | 1.363 | 3.920 | 0.515 | 3.575 | 0.548 | 3.566 | 0.434  | 0.946 | 0.312 |
| DB05-161  | Group 1   | 46.7 | 339 | 122 | 12.59 | 203 | 28 | 102 | 13.25 | bdl   | 65.4   | 9.728  | 24.386 | 3.462 | 13.335 | 3.887 | 1.697 | 4.753 | 0.750 | 5.126 | 1.032 | 2.834 | 0.421 | 2.696 | 0.395 | 2.927 | 0.423  | 0.890 | 0.842 |
| DB02-198b | Group 2   | 39.0 | 249 | bdl | 5.72  | 244 | 24 | 69  | 5.66  | 0.131 | 144.0  | 4.144  | 9.549  | 1.418 | 7.727  | 2.654 | 1.064 | 3.506 | 0.689 | 4.281 | 0.914 | 2.687 | 0.362 | 2.595 | 0.427 | 1.746 | 3.145  | 0.314 | 0.000 |
| DB02-260  | Group 2   | 41.0 | 323 | bdl | 1.34  | 171 | 39 | 127 | 5.24  | bdl   | 24.6   | 5.922  | 16.249 | 2.395 | 12.819 | 4.140 | 1.425 | 5.526 | 0.923 | 6.714 | 1.421 | 4.267 | 0.685 | 4.183 | 0.653 | 3.319 | 0.637  | 0.419 | 0.133 |
| DB02-261  | Group 2   | 48.7 | 460 | 49  | 1.44  | 144 | 50 | 146 | 5.11  | 0.031 | 20.5   | 6.146  | 17.779 | 2.962 | 16.533 | 5.086 | 1.732 | 7.143 | 1.249 | 8.883 | 1.878 | 5.386 | 0.787 | 5.311 | 0.785 | 4.059 | 28.839 | 0.353 | 0.132 |
| DB05-149  | Group 2   | 59.0 | 392 | 153 | 1.80  | 95  | 21 | 48  | 3.31  | bdl   | 61.6   | 2.679  | 7.025  | 1.110 | 6.087  | 1.800 | 0.878 | 2.876 | 0.509 | 3.467 | 0.753 | 2.171 | 0.317 | 2.350 | 0.364 | 1.440 | 0.284  | 0.212 | 0.079 |
| DB05-155  | Group 2   | 49.2 | 412 | 65  | 1.19  | 150 | 42 | 113 | 4.06  | bdl   | 31.8   | 5.042  | 14.397 | 2.265 | 12.773 | 4.140 | 1.515 | 6.104 | 0.997 | 7.251 | 1.470 | 4.687 | 0.636 | 4.245 | 0.635 | 3.258 | 0.710  | 0.319 | 0.090 |
| DB05-156  | Group 2   | 52.3 | 515 | 48  | 1.68  | 177 | 52 | 156 | 5.75  | bdl   | 34.0   | 6.576  | 19.380 | 2.961 | 17.547 | 5.453 | 1.768 | 7.956 | 1.224 | 9.222 | 1.944 | 5.486 | 0.834 | 5.407 | 0.820 | 4.178 | 0.643  | 0.459 | 0.162 |
| DB02-196  | Group 3   | 46.8 | 350 | 78  | 0.66  | 29  | 26 | 45  | 0.55  | 0.050 | 4.6    | 1.069  | 3.932  | 0.899 | 4.921  | 2.203 | 0.902 | 3.403 | 0.551 | 4.359 | 1.017 | 2.848 | 0.462 | 2.877 | 0.435 | 1.598 | 1.656  | 0.049 | 0.079 |
| DB02-197  | Group 3   | 49.7 | 330 | 68  | 4.63  | 128 | 28 | 50  | 0.65  | 0.590 | 50.6   | 1.135  | 4.521  | 0.815 | 5.510  | 2.020 | 0.855 | 3.744 | 0.664 | 4.770 | 1.079 | 2.880 | 0.483 | 3.141 | 0.389 | 1.515 | 1.470  | 0.046 | 0.000 |
| DB02-198a | Group 3   | 48.9 | 320 | 67  | 6.45  | 143 | 26 | 45  | 0.53  | 0.383 | 47.6   | 1.045  | 3.794  | 0.728 | 4.819  | 2.119 | 0.843 | 3.116 | 0.588 | 4.555 | 1.016 | 2.852 | 0.454 | 3.060 | 0.480 | 1.329 | 1.232  | 0.042 | 0.048 |
| DB02-207  | Group 3   | 44.4 | 228 | bdl | 6.86  | 69  | 19 | 34  | 0.75  | 0.207 | 10.5   | 0.821  | 2.513  | 0.531 | 2.883  | 1.461 | 0.586 | 2.319 | 0.463 | 3.290 | 0.740 | 2.179 | 0.322 | 2.253 | 0.283 | 0.873 | 0.844  | 0.061 | 0.049 |
| DB02-216  | Group 3   | 49.1 | 282 | 96  | 0.90  | 83  | 22 | 40  | 0.42  | bdl   | 1.4    | 0.760  | 3.309  | 0.648 | 4.096  | 1.759 | 0.794 | 2.729 | 0.500 | 3.710 | 0.821 | 2.358 | 0.329 | 2.460 | 0.385 | 1.164 | 0.885  | 0.017 | 0.030 |
| DB02-239  | Group 3   | 51.6 | 392 | bdl | 0.53  | 29  | 43 | 97  | 1.22  | bdl   | 6.2    | 2.393  | 8.362  | 1.588 | 9.472  | 3.791 | 1.286 | 5.471 | 0.983 | 7.474 | 1.631 | 4.916 | 0.759 | 4.883 | 0.719 | 2.642 | 0.808  | 0.136 | 0.088 |
| DB05-114  | Group 3   | 54.2 | 474 | 54  | 0.54  | 66  | 41 | 65  | 0.85  | bdl   | 13.4   | 1.476  | 5.242  | 1.121 | 6.749  | 2.956 | 1.111 | 4.564 | 0.823 | 6.549 | 1.363 | 4.650 | 0.636 | 4.285 | 0.652 | 1.855 | 0.244  | 0.068 | 0.031 |
| DB05-135  | Group 3   | 55.7 | 435 | 50  | 2.89  | 130 | 45 | 103 | 1.24  | bdl   | 25.6   | 2.412  | 8.304  | 1.702 | 9.981  | 4.045 | 1.596 | 5.864 | 1.049 | 7.373 | 1.738 | 5.019 | 0.756 | 5.082 | 0.778 | 2.846 | 0.248  | 0.101 | 0.062 |
| DB05-152  | Group 3   | 39.1 | 254 | 66  | 29.27 | 194 | 20 | 44  | 0.62  | bdl   | 1180.8 | 1.163  | 3.620  | 0.676 | 4.232  | 1.712 | 0.715 | 2.729 | 0.451 | 3.366 | 0.690 | 1.959 | 0.309 | 2.114 | 0.278 | 1.261 | 0.505  | 0.078 | 0.039 |
| DB05-158  | Group 3   | 53.9 | 333 | 127 | 0.80  | 112 | 23 | 43  | 1.48  | bdl   | 12.4   | 1.935  | 5.481  | 1.008 | 4.953  | 1.975 | 0.944 | 3.071 | 0.498 | 3.876 | 0.781 | 2.432 | 0.331 | 2.356 | 0.314 | 1.153 | 0.261  | 0.100 | 0.034 |
| DJ01-104  | Group 3   | 43.3 | 313 | 47  | 20.36 | 108 | 28 | 52  | 0.75  | 0.220 | 58.3   | 1.414  | 4.681  | 0.905 | 5.600  | 2.391 | 0.917 | 3.603 | 0.622 | 4.745 | 1.030 | 3.241 | 0.435 | 3.127 | 0.448 | 1.657 | 1.719  | 0.083 | 0.124 |
| DJ01-106  | Group 3   | 44.0 | 304 | 66  | 7.53  | 107 | 24 | 38  | 0.50  | 0.150 | 10.8   | 1.023  | 3.533  | 0.681 | 4.178  | 1.861 | 0.750 | 2.866 | 0.562 | 3.933 | 0.840 | 2.643 | 0.453 | 2.717 | 0.423 | 1.185 | 1.077  | 0.042 | 0.033 |
| DJ01-107  | Group 3   | 45.8 | 320 | 53  | 7.88  | 111 | 25 | 42  | 0.65  | 0.142 | 30.0   | 1.091  | 3.754  | 0.689 | 4.854  | 1.882 | 0.794 | 3.229 | 0.560 | 4.207 | 1.044 | 2.713 | 0.366 | 2.691 | 0.412 | 1.252 | 1.445  | 0.064 | 0.081 |
| DB02-107  | inner OIC | 50.8 | 314 | 114 | 0.86  | 103 | 20 | 49  | 3.00  | 0.042 | 27.8   | 2.706  | 7.145  | 1.102 | 5.921  | 2.076 | 0.793 | 2.926 | 0.542 | 3.521 | 0.816 | 2.270 | 0.331 | 2.062 | 0.343 | 1.339 | 0.698  | 0.205 | 0.076 |
| DB02-110  | inner OIC | 48.8 | 331 | 101 | 1.08  | 129 | 21 | 58  | 3.60  | 0.036 | 17.5   | 3.119  | 8.500  | 1.406 | 7.561  | 2.453 | 0.872 | 3.076 | 0.538 | 3.975 | 0.841 | 2.379 | 0.340 | 2.353 | 0.321 | 1.552 | 1.081  | 0.252 | 0.088 |
| DB02-119  | inner OIC | 46.5 | 340 | 85  | 4.09  | 231 | 21 | 85  | 6.62  | 0.027 | 54.0   | 6.380  | 16.343 | 2.332 | 12.564 | 3.999 | 1.206 | 4.353 | 0.589 | 4.433 | 0.850 | 2.073 | 0.303 | 1.805 | 0.275 | 2.374 | 0.596  | 0.454 | 0.135 |
| DB02-120  | inner OIC | 52.5 | 355 | 94  | 0.68  | 112 | 21 | 53  | 3.64  | 0.047 | 19.7   | 3.027  | 8.211  | 1.371 | 6.414  | 2.501 | 1.098 | 3.106 | 0.500 | 3.858 | 0.848 | 2.264 | 0.341 | 2.633 | 0.342 | 1.593 | 0.991  | 0.235 | 0.109 |
| DB02-132  | inner OIC | 51.7 | 357 | 93  | 0.86  | 116 | 23 | 63  | 3.82  | 0.014 | 34.4   | 3.333  | 9.346  | 1.481 | 8.157  | 2.649 | 1.027 | 3.623 | 0.592 | 4.234 | 0.853 | 2.484 | 0.369 | 2.470 | 0.372 | 1.891 | 0.740  | 0.270 | 0.093 |
| DB02-135  | inner OIC | 50.0 | 341 | 109 | 0.94  | 143 | 22 | 58  | 3.54  | 0.031 | 39.9   | 3.132  | 8.535  | 1.418 | 7.150  | 2.660 | 0.960 | 2.995 | 0.568 | 3.998 | 0.929 | 2.285 | 0.324 | 2.492 | 0.381 | 1.592 | 0.912  | 0.253 | 0.091 |
| DB02-160  | inner OIC | 54.3 | 350 | 73  | 2.04  | 101 | 24 | 47  | 1.96  | 0.031 | 118.0  | 2.009  | 5.568  | 0.901 | 5.327  | 1.956 | 0.773 | 2.921 | 0.530 | 4.183 | 0.897 | 2.791 | 0.372 | 2.661 | 0.411 | 1.334 | 0.822  | 0.137 | 0.050 |
| DB02-165  | inner OIC | 49.4 | 302 | 128 | 1.02  | 97  | 17 | 36  | 2.60  | 0.037 | 14.7   | 2.057  | 5.668  | 0.888 | 4.786  | 1.640 | 0.612 | 2.163 | 0.377 | 2.845 | 0.626 | 1.747 | 0.265 | 1.918 | 0.253 | 1.108 | 1.109  | 0.162 | 0.063 |
| DB02-201  | inner OIC | 39.7 | 233 | 68  | 1.75  | 195 | 15 | 26  | 1.05  | 0.026 | 20.0   | 1.077  | 2.990  | 0.530 | 3.371  | 1.313 | 0.479 | 1.678 | 0.327 | 2.697 | 0.605 | 1.733 | 0.229 | 1.591 | 0.262 | 0.770 | 0.810  | 0.090 | 0.038 |
| DB02-203  | inner OIC | 52.8 | 459 | 38  | 1.94  | 47  | 31 | 76  | 4.68  | 0.030 | 6.4    | 5.012  | 12.469 | 1.873 | 10.893 | 3.568 | 1.235 | 4.575 | 0.758 | 5.463 | 1.195 | 3.181 | 0.469 | 3.405 | 0.466 | 2.272 | 1.292  | 0.311 | 0.097 |
| DB02-204  | inner OIC | 48.6 | 348 | 76  | 4.62  | 165 | 22 | 54  | 3.23  | 0.093 | 47.2   | 3.541  | 8.820  | 1.403 | 6.726  | 2.619 | 0.927 | 3.208 | 0.527 | 3.733 | 0.839 | 2.303 | 0.319 | 2.193 | 0.348 | 1.652 | 0.925  | 0.227 | 0.075 |
| DB02-230  | inner OIC | 49.9 | 352 | 98  | 0.98  | 107 | 24 | 62  | 3.86  | 0.021 | 16.2   | 3.077  | 9.101  | 1.402 | 7.476  | 2.451 | 1.044 | 3.378 | 0.645 | 4.183 | 0.895 | 2.747 | 0.348 | 2.600 | 0.369 | 1.804 | 0.989  | 0.239 | 0.086 |
| DB02-246  | inner OIC | 46.3 | 410 | 22  | 1.98  | 123 | 28 | 58  | 2.81  | 0.024 | 57.8   | 3.565  | 8.797  | 1.286 | 7.630  | 2.667 | 0.979 | 3.577 | 0.634 | 4.691 | 0.985 | 3.252 | 0.501 | 3.205 | 0.524 | 1.772 | 1.003  | 0.317 | 0.100 |
| DB02-266  | inner OIC | 50.7 | 406 | 72  | 4.51  | 130 | 23 | 56  | 4.05  | 0.105 | 22.0   | 3.350  | 8.861  | 1.393 | 7.257  | 2.166 | 0.972 | 2.999 | 0.537 | 3.696 | 0.812 | 2.456 | 0.362 | 2.297 | 0.370 | 1.469 | 0.910  | 0.263 | 0.093 |
| DB05-107  | inner OIC | 49.8 | 314 | 147 | 1.10  | 130 | 19 | 44  | 3.14  | bdl   | 16.2   | 2.624  | 7.025  | 1.107 | 5.844  | 1.955 | 0.699 | 2.551 | 0.409 | 3.100 | 0.697 | 1.974 | 0.317 | 2.124 | 0.301 | 1.247 | 0.318  | 0.206 | 0.074 |
| DB05-108  |           |      |     |     |       |     |    |     |       |       |        |        |        |       |        |       |       |       |       |       |       |       |       |       |       |       |        |       |       |

Table DR4. Radiogenic isotope data

| Sample               | Group   | Age <sup>(a)</sup><br>(Ma) | Sm<br>(ppm) | Nd<br>(ppm) | <sup>147</sup> Sm/ <sup>144</sup> Nd | <sup>143</sup> Nd/ <sup>144</sup> Nd <sub>m</sub> | <sup>143</sup> Nd/ <sup>144</sup> Nd <sub>t</sub> | εNd <sub>t</sub> | Pb <sup>(b)</sup><br>(ppm) | U <sup>(c)</sup><br>(ppm) | Th<br>(ppm) | <sup>206</sup> Pb/ <sup>204</sup> Pb <sub>m</sub> | <sup>207</sup> Pb/ <sup>204</sup> Pb <sub>m</sub> | <sup>208</sup> Pb/ <sup>204</sup> Pb <sub>m</sub> | <sup>206</sup> Pb/ <sup>204</sup> Pb <sub>t</sub> | <sup>207</sup> Pb/ <sup>204</sup> Pb <sub>t</sub> | <sup>208</sup> Pb/ <sup>204</sup> Pb <sub>t</sub> |
|----------------------|---------|----------------------------|-------------|-------------|--------------------------------------|---------------------------------------------------|---------------------------------------------------|------------------|----------------------------|---------------------------|-------------|---------------------------------------------------|---------------------------------------------------|---------------------------------------------------|---------------------------------------------------|---------------------------------------------------|---------------------------------------------------|
| DB05-113             | Group 1 | 62                         | 5.342       | 18.722      | 0.172                                | 0.513063                                          | 0.512993                                          | 8.483            | 0.749                      | 0.271                     | 0.898       | 19.186                                            | 15.569                                            | 38.641                                            | 18.961                                            | 15.558                                            | 38.396                                            |
| DB05-153             | Group 1 | 62                         | 4.938       | 17.421      | 0.171                                | 0.512983                                          | 0.512914                                          | 6.935            | 0.697                      | 0.312                     | 0.946       | 19.373                                            | 15.588                                            | 38.823                                            | 19.094                                            | 15.575                                            | 38.544                                            |
| DB05-155             | Group 2 | 62                         | 4.140       | 12.773      | 0.195                                | 0.513094                                          | 0.513015                                          | 8.911            | 0.511                      | 0.090                     | 0.319       | 18.449                                            | 15.523                                            | 38.116                                            | 18.341                                            | 15.518                                            | 37.990                                            |
| DB05-155 (replicate) | Group 2 | 62                         | 4.140       | 12.773      | 0.195                                | 0.513097                                          | 0.513018                                          | 8.960            | 0.511                      | 0.090                     | 0.319       | 18.457                                            | 15.524                                            | 38.125                                            | 18.349                                            | 15.519                                            | 38.000                                            |
| DB02-197             | Group 3 | 62                         | 2.020       | 5.510       | 0.221                                | 0.513221                                          | 0.513132                                          | 11.192           | 0.220                      | 0.041                     | 0.046       | 18.514                                            | 15.528                                            | 38.058                                            | 18.401                                            | 15.522                                            | 38.017                                            |
| DB02-239             | Group 3 | 62                         | 3.791       | 9.472       | 0.241                                | 0.513190                                          | 0.513093                                          | 10.424           | 0.379                      | 0.088                     | 0.136       | 18.686                                            | 15.527                                            | 38.092                                            | 18.544                                            | 15.521                                            | 38.020                                            |
| DB05-114             | Group 3 | 62                         | 2.956       | 6.749       | 0.264                                | 0.513227                                          | 0.513120                                          | 10.964           | 0.270                      | 0.031                     | 0.068       | 18.506                                            | 15.508                                            | 37.946                                            | 18.437                                            | 15.504                                            | 37.895                                            |
| DB05-135             | Group 3 | 62                         | 4.045       | 9.981       | 0.244                                | 0.513183                                          | 0.513084                                          | 10.251           | 0.399                      | 0.062                     | 0.101       | 18.700                                            | 15.525                                            | 38.136                                            | 18.605                                            | 15.520                                            | 38.085                                            |

(a) value used for the age correction, see Supplementary File 1 for a discussion on correcting radiogenic ingrowth

(b) based on Nd/Pb = 25±5.

(c) sample DB02-197 estimated.

Nd and Pb isotope ratios by TIMS in static multi collection mode on a TRITON Plus and MAT262 respectively. Mass bias correction uses <sup>146</sup>Nd/<sup>144</sup>Nd = 0.7219 and a <sup>207</sup>Pb-<sup>204</sup>Pb double spike. Sample data are reported relative to <sup>143</sup>Nd/<sup>144</sup>Nd = 0.511850 ± 6 (2SD, n = 114) for La Jolla and <sup>206</sup>Pb/<sup>204</sup>Pb = 16.9427 ± 21, <sup>207</sup>Pb/<sup>204</sup>Pb = 15.5005 ± 21, <sup>208</sup>Pb/<sup>204</sup>Pb = 36.7278 ± 46, <sup>208</sup>Pb/<sup>206</sup>Pb = 2.167765 ± 63 and <sup>207</sup>Pb/<sup>206</sup>Pb = 0.914877 ± 32 (2SD, n = 17) for NBS981.

2016125\_BuchsEtAl\_Osa Igneous Complex\_Tables.xlsx

Table 1. Location of analyzed samples

Table 2. XRF analytical results (wt%)

Table 3. LA-ICP-MS analytical results (ppm)

Table 4. Radiogenic isotope data
